# Supplementary material for: Molecular Characterization and Biological Function of a Novel LncRNA CRNG in Swine
Source: PubMed Central journal article supplement (PMC6537671; doi:10.3389/fphar.2019.00539), 2019-05-21
Supplement: Data_Sheet_3.pdf [file Data_Sheet_3.pdf]

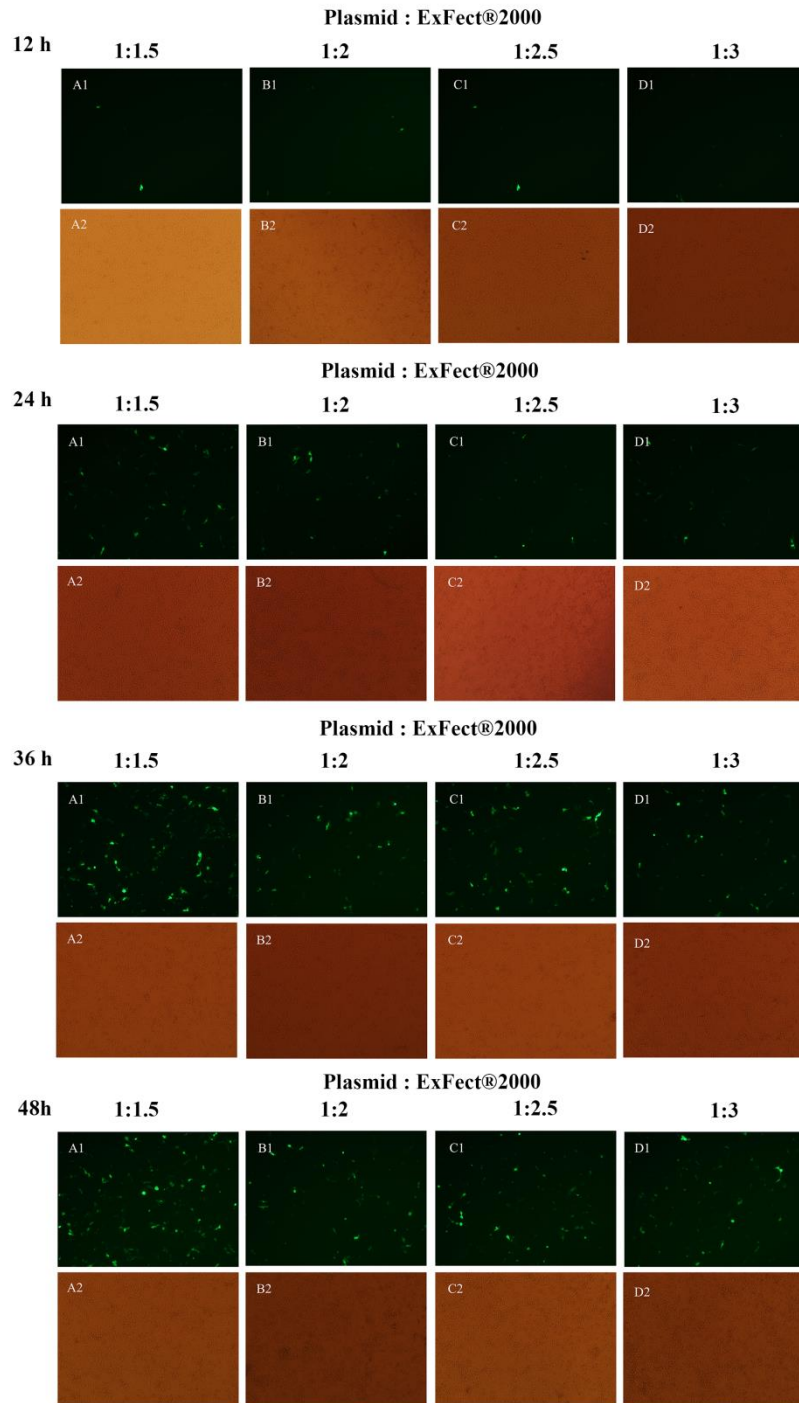

**Figure 1 The overexpression efficiency after transfecting the cells with pcDNA3.0-EGFP-CRNG vector**

*Note:* According to the effect of transfection, Plasmid: ExFect®2000=1: 1.5 ( $\mu\text{g}/\mu\text{L}$ ) was selected and transfected for 48 h.

SiRNA: Lipofectamine 2000

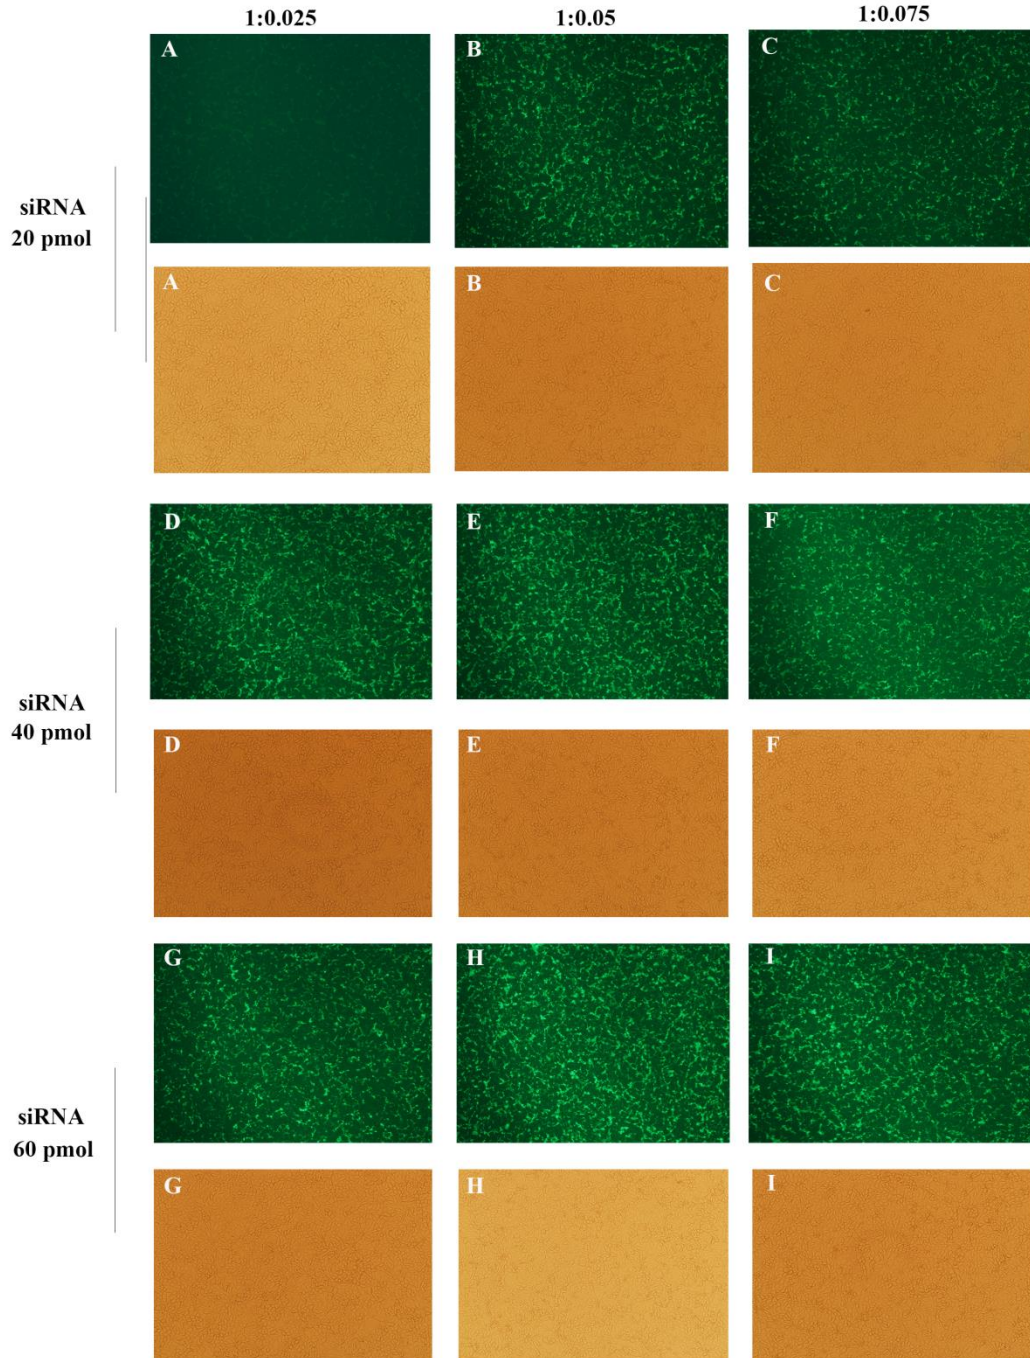

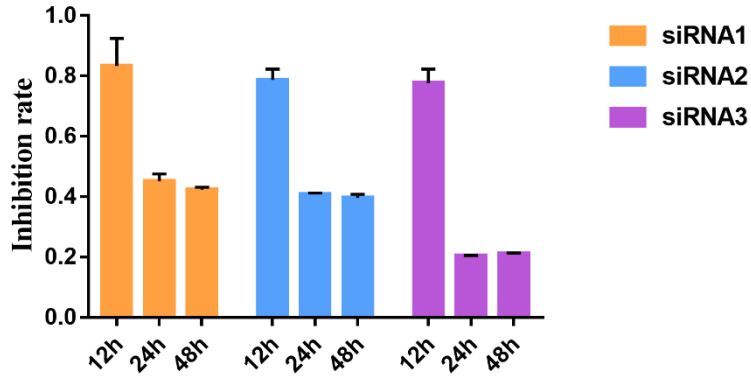

**Figure 2** The silencing efficiency after transfecting the cells with siRNA

*Note:* Negative control FAM (UUCUCCGAACGUGUCACGUTT; ACGUGACACGUUCGGAGAATT). According to the effect of transfection, siRNA FAM 40 pmol and siRNA: Lipofectamine 2000 was selected.

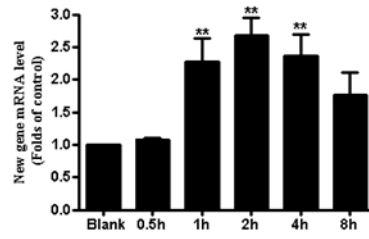

**Figure 3** The time-effect relationships of CRNG induced by cyadox in PK-15 cells

**Table 1** The siRNA sequence of CRNG

| Name                 | Sequence (5'-3')                               |
|----------------------|------------------------------------------------|
| Negative control     | UUCUCCGAACGGUCACGUTT<br>ACGUGACACGUUCGGAGAATT  |
| Negative control FAM | UUCUCCGAACGUGUCACGUTT<br>ACGUGACACGUUCGGAGAATT |
| siRNA1               | GCAAACCGUUGAUCGAAUTT<br>AUUCGAUCAACAGGUUUGCTT  |
| siRNA2               | GGACUCUCUUUGACCCUUTT<br>AAAGGGUCAAGAGAGUCCTT   |
| siRNA3               | GCAUCUGUCUUAGGAUCATT<br>UGAUCCUAAGCACAGAUGCTT  |
